# Supplementary material
Source: publisher site journal article supplement (https://www.dovepress.com/article/329668)
Supplement: Supplementary file 1 [file get_supplementary_file.php]

| **Table S1:** Studies characteristics regarding their sensors used, experimental procedures, detection methods and detection performance | | | |
| --- | --- | --- | --- |
| **Authors**  **Sensors** | **Experimental Procedures** | **Detection Methods** | **Detection performance Main results (%)** |
| Adolf et al., 201827  Panasonic's Grid-EYE® AMG88??  8x8 pixels | Empty room Sensor: 1 mounted on the ceiling at 2.85 m from the floor  Ground capture perimeter: 3 m x 3 m Ambient temperature: between 23 and 25 °C Participant: 4  Per participant: 3 trials, 1 at 23 °C, 1 at 24 °C, and  1 at 25 °C. Per trial: 5 classes of postures were performed several times, each held for 2s. Nobody and no object  Only an object (chair or table) Standing position Sitting position Lying position Total recorded data: 399 training data and 96 testing data. | Frame rate: 10 fps.  Average thermal spatial distributions in frame were computed over last 10 frames. 495 unique measurements (4950 frames) were performed and roughly labeled into the five categories.  Machine learning classifier: CNN Inception Version 3 developed by Szegedy et al. 201547 (https://arxiv.org/abs/1512.00567). | Performance for the five categories   |  | Se | Sp | | --- | --- | --- | | Nobody | 48 | 89 | | Only object | 41 | 90 | | Standing | 42 | 83 | | Siting | 50 | 82 | | Laying | 47 | 87 |   Performance for three categories   |  | Se | Sp | | --- | --- | --- | | Nobody | 75 | 100 | | Only object | 85 | 79 | | Standing | 85 | 93 | |
| Chen & Ma, 201528  Melexis MLX90620   16x4 pixels | Empty room Sensors: 2 mounted on the wall at 1.2 m from the floor, spaced 3.3 m, each near an angle and oriented 30° inward and 8.2° toward the floor.  Ground capture perimeter: 3 m x 2.35 m Ambient temperature: unspecified Participants: 5  5 normal actions were performed 16 times each:  Sitting down  Bending  Squatting  Walking  Standing up  8 types of falls, each in one direction, were performed 10 times each.  Total recorded data: 80 normal and 80 fall actions treated using a k-fold cross-validation.  N.B.: A second step concerned the pursuit of the participant walking along a line (not relevant to the topic of this review). | Frame rate: 16 fps.  Noise Reduction of original image: the variance of a white noise signal was reduced to the multiple of 1/*M* scale*,* with *M* corresponding to an average of frames together (*M* = 3).  Foreground and background generation: the foreground pixel was generated by thresholding the difference between the observed image and the background reference image.  Threshold: 2.5 °C multiplied by the standard deviation of temperature.  Sensor choice: they segmented the analysis by window of 1 second. Then, they chose a single segmented data, based on the foreground region detected by both sensors at the same time. When a sensor had a larger foreground area, then extraction of features from this sensor because the person is closer there.  7 features:  *(minv)* Minimum value of vertical trajectory. *(Vv)* Vertical velocity. *(Vh)* Horizontal velocity. *(MADv)* Mean absolute deviation of vertical trajectory. *(MADh)* Mean absolute deviation of horizontal trajectory. *(σv)* Standard deviation of vertical trajectory. *(σh)* Standard deviation of horizontal trajectory.  By considering the correlation between features, the Mahalanobis distance was used instead of Euclidean distance.  Machine learning classifier: classification into "fall" and "non-fall" using a  k-NN algorithm. | Accuracy (Ac), Sensibility (Se), and Specificity (Sp): equations unspecified.  They scanned and determined both k value and feature subsets with the highest performance. They determined the k value by scanning the k value from 1–79 with step size 2. From 7 features, there were totally 127 amounts of combination of feature subsets. The performance was estimated by k-fold cross-validation.  Highest performance for k = 9 and the feature subset, including *Vv*, *MADh*, *minv*, and *σh.*   | Ac | Se | Sp | | --- | --- | --- | | 93 | 95.25 | 90.75 | |

| Chen & Wang, 201829  Panasonic's Grid-EYE® AMG8853  8x8 pixels  NB: An ultrasonic sensor was also used in this study, but the authors analyzed performance with and without it | Empty room Sensor: 1 mounted on the head of mini-robot (80 cm high) orientable along the x and z axes and following the participant.  Capture perimeter: height of a human and 1.8 m in depth Ambient temperature: 24.5 °C Participants: 3  They recorded actions at 3 distances from the participant (1.2, 1.5 et 1.8 m), profile view.  Per distance and per participant: Step 1: discrete recordings  Falling forward and sideway 15 times each.  Standing up from a sitting position 10 times.  Sitting down on a chair 10 times.  Stooping down to pick up an item from the ground and returning to the standing position 10 times.  Recorded data per participant: 180 training data and 60 testing data.  Step 2: continuous recordings  A scenario was performed twice following the orders to sit, to stand, to stoop, to sit, to stand, to fall forward, to stand, to sit, to stand, and to fall sideway.  Recorded data per participant: 60 testing data. | Frame rate: 10 fps.  Foreground and background generation:  Background generation over 10 s without anyone. When, between several consecutive frames, the root mean square *(RMS)* of the temperature data (calculated by series of 2 consecutive frames) was greater than a threshold (one or more times in a period of 10 frames), then there was an action and an extraction of the features. Threshold: RMS> 0.6 °C.  5 Features:  *(Nm)* Number of consecutive frames where motion is detected. *(Tm)* Peak value of each pixel’s temperature change of before and after an activity. *(Tc)* Peak temperature change of each pixel between two consecutive frames. *(Dm)* Distance of between the maximum temperature pixel before and after an activity. (*Ddiff)* Ultrasonic sensor data difference between the start and end of an activity.  Machine learning classifier: classification into "fall" and "non-fall" using an SVM where they used LibSVM. | Accuracy (Ac): equation unspecified.  Step 1: highest accuracies for discrete recordings  Global Accuracy (Acg)   |  | Acg |  | | --- | --- | --- | | At 1.2m | 93.3 | *Tc + Dm + Tm* | | At 1.5m | 94.7 | *Nm + Tc + Tm* | | At 1.8m | 88.7 | *Tc + Dm + Tm* |   Step 2: highest accuracies for continuous recordings for the feature subset, including, *Tc*, *Dm*, and *Tm*  Estimates from graphs (global, fall and non-fall)   |  | Acg | Acf | Acnf | | --- | --- | --- | --- | | At 1.2m | 65 | 80-85 | 60 | | At 1.5m | 70 | 80-85 | 60-65 | | At 1.8m | 65 | 55-60 | 65-70 | |
| --- | --- | --- | --- | --- | --- | --- | --- | --- | --- | --- | --- | --- | --- | --- | --- | --- | --- | --- | --- | --- | --- | --- | --- | --- | --- | --- | --- | --- | --- | --- | --- |
| Fan et al., 201730   Fan et al., 201831  Panasonic's Grid-EYE® AMG8832  8x8 pixels | Empty room Sensor: 1 mounted on the ceiling (unspecified height). Ground capture perimeter: unspecified Ambient temperature: between 19 and 23 °C Participants: 1  Step 1: The participant fell in directions perpendicular (front view) to the sensor and a three different distances (in the middle of the field, shifted on one side, shifted on the other).  Step 2: The participant fell in directions parallel (profile view) to the sensor and at three different depths (close, moderately close, more distant).  Total recorded data: 240 training data and 72 testing data | Frame rate: 10 fps.  Data were collected in a 2-s (outer) window (64 pixels x 20 frames). Data produced by the Grid-Eye was firstly filtered with one of the filters. Filtered data was then passed to one of the neural network classifiers.  Filters:  Wavelet (Daubechies 4 tap) *vs.* Median (inner window of size 5 frames) *vs.* Gaussian (inner window of size 5 frames).  Machine learning classifiers: classification into "fall" and "non-fall" using an RNN. GRU *vs.* GRU-ATT *vs.* LSTM *vs.* LSTM-ATT *vs*. MLP.  Hidden architectures for the GRU and LSTM classifiers:  Input layer with 64 nodes (64 x 1), LSTM or GRU hidden layer with 64 nodes, perceptron hidden layer with 64 nodes, and output with 2 nodes.  Hidden architecture for the MLP classifier: Input layer with 1280 (64 x 20), fully connected hidden layer with 400 nodes, and output with 2 nodes. | Step 1: front view   |  | Pr | Se | F1 | | --- | --- | --- | --- | | GRU-ATT (no filter) | 89.1 | 91.6 | 90.4 | | GRU (no filter) | 75 | 91.6 | 82.5 | | LSTM-ATT (no filter) | 80.4 | 91.6 | 85.7 | | LSTM (no filter) | 77.7 | 92.2 | 96.4 | | MLP (gaussian) | 66.6 | 72.2 | 69.3 |   Step 2: profile view   |  | Pr | Se | F1 | | --- | --- | --- | --- | | GRU-ATT (median) | 97.2 | 100 | 98.6 | | GRU (gaussian) | 97.2 | 97.2 | 97.2 | | LSTM-ATT (no filter) | 94.7 | 100 | 97.2 | | LSTM (median) | 100 | 100 | 100 | | MLP (median) | 97.2 | 100 | 98.6 | |

| Gochoo et al., 201832  Panasonic's Grid-EYE® AMG8833  8x8 pixels | Empty room Sensors: 3 sensors. 1 mounted on the ceiling at 2.7 m from the floor (*z* axe), 2 mounted on two adjacent walls 0.9 m from the floor (*x* and *y* axes). Ground capture perimeter: 3.3 m x 3.3 m  Ambient temperature: between 23 and 24 °C Participants: 4 (age = 24–34 years, height = 160–184 cm)  Per participant:  8 classes of postures were performed several times, each held for 50s. The participant was placed at 1.5 m from the sensors mounted on the walls. Standing position Hand raising position Akimbo position Standing and keeping the arms wide opens position Squat position Toe touching position Crawling position Lying position  Total recorded data: 15063 postures (approximately 1880 data per posture and 470 per participant) using a k-fold cross-validation. | Frame rate: 10 fps.  After receiving 64×3 floating point numbers, each sensor had 64 floating point numbers with one decimal digit for each thermal pixel, from the three nodes, they converted floating point numbers of each node into 8 × 8 heatmap where the red and blue colors represent the highest and the coldest temperature, respectively. Then, the three 8 × 8 heatmaps were concatenated into a heatmap with the size of 24 × 8 pixels with *y*, *x*, and *z* order. Then, they increased the heatmap by two. The heatmap size became 48 × 16 (24 × 8 was not a sufficient size for the three convolutional layers followed by max pooling layers).  Machine learning classifier: classification into 8 postures using an DCNN.  Hidden architecture: Panasonic input layer 48 x 16, Convolutional Layer 48 x 16 with kernel of size 3 x 3 (16 feature maps), Maxpooling hidden Layer 24 x 8 pooling with a window of size 2 × 2 (16 feature maps), Convolutional hidden Layer 24 x 8 with kernel of size 3 x 3 (64 feature maps), Maxpooling hidden Layer with a window of size 2 × 2 (64 feature maps), Convolutional hidden Layer 12 x 4 with kernel of size 3 x 3 (128 feature maps), Fully Connected hidden layer with 128 neurons, Fully Connected hidden layer with 64 neurons, Fully Connected SoftMax hidden layer with 32 neurons, and 8 outputs (8 postures). ReLu activation function was used for all the convolutional layers and fully connected layers. | The performance was estimated by 10-fold  cross-validation.   | Ac | Pr | Se | Sp | F1 | | --- | --- | --- | --- | --- | | Stand | | | | | | 99.83 | 99.38 | 99.17 | 99.92 | 100 | | Hand rise | | | | | | 99.97 | 100 | 99.79 | 100 | 99.89 | | Akimbo | | | | | | 99.82 | 99.07 | 99.63 | 99.85 | 99.35 | | Open wide arms | | | | | | 99.99 | 99.94 | 99.89 | 100 | 100 | | Squat | | | | | | 100 | 100 | 100 | 100 | 100 | | To Touch | | | | | | 99.99 | 100 | 99.89 | 100 | 99.95 | | Crawl | | | | | | 100 | 100 | 100 | 100 | 100 | | Lie | | | | | | 100 | 100 | 100 | 100 | 100 | | Global | | | | | | 99.95 | 99.81 | 99.80 | 99.97 | 99.95 | |
| --- | --- | --- | --- | --- | --- | --- | --- | --- | --- | --- | --- | --- | --- | --- | --- | --- | --- | --- | --- | --- | --- | --- | --- | --- | --- | --- | --- | --- | --- | --- | --- | --- | --- | --- | --- | --- | --- | --- | --- | --- | --- | --- | --- | --- | --- | --- | --- | --- | --- | --- | --- | --- | --- | --- | --- | --- | --- | --- | --- | --- | --- | --- | --- | --- | --- | --- | --- | --- | --- | --- | --- | --- | --- | --- | --- | --- | --- | --- | --- | --- | --- | --- | --- | --- | --- | --- | --- | --- | --- | --- | --- | --- | --- | --- | --- | --- | --- | --- |

| Hayashida et al., 201733,34  Panasonic's Grid-EYE® AMG8831   8x8 pixels | Empty room Sensor: 1 mounted on the ceiling at 2.6 m from the floor. Ground capture perimeter: 2.73 m x 2.73 m Ambient temperature: between 18 and 28 °C Participants: 7  Per participant:  A scenario was performed by following the orders to walk, to stand, to sit, to stand, to walk, and to fall, ten times. The walking speed was 1 m/s. Total recorded data: 420 actions including 70 falls.  Several conditions were manipulated:  Experiment 1: they tested their system at six room temperatures (18, 20, 22, 24, 26 and 28 °C).  Experiment 2: they placed three different electric devices inside the monitored area and carried the tests when each of them was switched on while the others were off and when all the devices were switched on (electric heater, Halogen lamp and notebook computer).  Experiment 3: they tested their system at different room illuminance levels obtained during daytime and nighttime. | Frame rate: 10 fps.  5 features:  *(M)* The maximal thermal difference between the background and foreground pixels. *(ξ)* Variance of the maximal thermal difference. *(Δ)* The duration of activity. *(L)* The motion distance.  Fall detection algorithms: Step 1: foreground and background generation.  Threshold: *ϴ*1 = 3  The capture perimeter was divided into 8 regions. Acquisition of the spatial distribution of temperatures every frame (0.2 s). Periodic determination (15 min) of the spatial temperature distribution of the room to generate the background.  During real-time image acquisition, when no temperature change was observed for 15 min following a threshold (*M* <*ϴ*1) and in one of the 8 regions, then the Background was updated from the 4 lowest pixels in temperature and from a formula. When *M* ≥ *ϴ*1, the foreground was generated from the current image.  Step 2: action classifications.  Thresholds: unspecified. When *M*> *ϴ*3, there was no one in the scene and the system returned to a new acquisition.  When *ϴ*3 <*M* <*ϴ*2, the system recorded the uptime *(Δ),* the distance *(L)* and the variance *(ξ).* When *L* <ϴ4, then *Δ* <*ϴ*5 and *ξ*> *ϴ*6, then there was a fall, otherwise, the system classified it as non-fall, recorded the current time and the coordinates, modified *M* and returned to a new acquisition.  When *M* <*ϴ*2, there was someone but who did not fall. | Accuracy fall (Acf): The number of falls correctly classified divided by the total number of falls (in %) Accuracy non-fall (Acnf): The number of non-falls correctly classified divided by the total number of non­falls (in %)   | Experiment 1 | Acf | Acnf | | --- | --- | --- | | 18 °C | 97 | 3 | | 20 °C | 96 | 4 | | 22 °C | 96 | 4 | | 24 °C | 94 | 7 | | 26 °C | 90 | 8 | | 28 °C | 83 | 17 | | Experiment 2 |  |  | | Halogen lamp | 97 | 3 | | Electric heater | 96 | 4 | | Notebook computer | 96 | 4 | | All | 96 | 4 | | Experiment 3 |  |  | | 20-30 lux (no light) | 93 | 7 | | 120 lux (sunlight) | 93 | 7 | | 900 lux (room lighting) | 96 | 4 | | 1000-1050 lux (sunlight and room lighting) | 92 | 8 | |
| --- | --- | --- | --- | --- | --- | --- | --- | --- | --- | --- | --- | --- | --- | --- | --- | --- | --- | --- | --- | --- | --- | --- | --- | --- | --- | --- | --- | --- | --- | --- | --- | --- | --- | --- | --- | --- | --- | --- | --- | --- | --- | --- | --- | --- | --- | --- | --- | --- | --- | --- | --- | --- | --- | --- |

| Liu et al., 202035  Panasonic's Grid-EYE® AMG8853  8x8 pixels | Empty room Sensor: 1 mounted on the ceiling at 3.5 m from the floor. Ground capture perimeter: 4 m x 4 m Ambient temperature: unspecified Participants: 8 (height = 160–180 cm)  The participants performed walking, jogging, squatting, lying down, falling, staying still, etc. (type and number of actions per participant unspecified). | Frame rate: unspecified.  Background subtraction: They collected the background temperature and performed bicubic interpolation on the data frame. The current frame used background subtraction to remove the other heat and background temperature. To facilitate the extraction of fall features, the interpolated data was scaled to the original image size.  To reduce resource consumption, sampling was performed every four frames. A Binarization was first performed on the data. Then, the connected component method was performed to select the largest area block and identify its centroid position. When the centroid coordinates appear 5 or more times during the sampling process, then the participant was stationary, otherwise moving.  3 features: *(Tre)* Stationary arrival time. *(Sr)* Static detection area. *(Ss)* Detection area of the law (Sr + the detection area of the pixel before the person is still).  5 additional features to differentiate falling and running: *(Kurtosis)* Kurtosis of the temperature detected by one pixel before static. *(Pd)* Peak distance (time spent from one pixel area to another during movement). *(Tbg)* Detection area of the pixel before the static. *(Td)* Stratified temperature difference (temperature after stratification minus average temperature after stratification). *(Tp)* Peak temperature difference (average temperature after stratification minus average temperature before stratification).  Machine learning classifier: RandFor  They used two layers of threshold detection to improve system detection accuracy. The Threshold 1 was defined in the first-layer classifier to exclude the impact of the jogging data, and the Threshold 2 was defined in the second-layer random forest to detect the fall. When the training accuracy 1 <Threshold 1 and training accuracy 2> Threshold 2, then the participant fell. | Accuracy (Ac), Precision (Pe), Sensibility (Se), and F1: equations unspecified.  (a receiver operating characteristic (ROC) curve and relevant analysis for the classification system was also presented)   | TP (fall) | FP | TN  (non-fall) | FN | | --- | --- | --- | --- | | 100 | 0 | 86 | 14 |  |  | Pr | Se | F1 | | --- | --- | --- | --- | | Global | 96 | 96 | 96 | | Fall | 100 | 86 | 92 | | Normal Event | 95 | 100 | 97 |   Area Under the Curve: AUC = 0.97  Then, they searched the number of trees and the number of training samples (in cross validation method) to have the best global accuracy. Acg = 94% (with 23 tree and 32 training samples) |
| --- | --- | --- | --- | --- | --- | --- | --- | --- | --- | --- | --- | --- | --- | --- | --- | --- | --- | --- | --- | --- | --- | --- | --- | --- | --- | --- | --- |
| Mashiyama et al., 201422  Panasonic's Grid-EYE® AMG8831  8x8 pixels | Empty room 1 Sensor: 1 mounted on the ceiling at 2.57 m from the floor. Ground capture perimeter: unspecified Ambient temperature: 23 °C Participants: 6  Total recorded data: 60 falls and 82 non-falls.  Empty rooms 2, 3 and 4 Sensor: 1 mounted on the ceiling at 2.59–2.66 m from the floor. Ground capture perimeter: between 2.94 m x 2.94 m and 3.04 m x 3.04 m Ambient temperature: between 16 and 27 °C Participants: 5 Total recorded data: 30 falls and 172 non-falls.  Per participant:  Falling ten times.  Sitting down five times.  Walking five times. | Frame rate: 10 fps  When the temperature variance>at a specific threshold, then 4 features were extracted.  Threshold: 1 °C.  4 features:  *(Nf)* Number of consecutive frames where motion is detected (set to 20 frames).  *(Pmax)* Maximum number of pixels that variance of temperature changed during *Nf*.  *(Tmax)* Maximum variance of temperature during *Nf*.  *(Dm)* Distance of a maximum temperature pixel before and after an activity.  When small values of Nf and Pmax were obtained, their system judged as a non-fall based on a certain threshold before classification of k-NN.  Machine learning classifier: classification into "fall" and "non-fall" using a k-NN algorithm (k = 5). | Accuracy (Ac): The number of correct classifications divided by the number of all activities (in %)  Sitting down and walking were categorized as a non-fall. Ratio of training data to test data unspecified.  Room 1: Training data contains participant’s data   | TP | FP | TN | FN | Ac | | --- | --- | --- | --- | --- | | 98.3 | 6.1 | 93.9 | 1.7 | 95.8 |   Rooms 2–4: Training data does not contain participant’s data   | TP | FP | TN | FN | Ac | | --- | --- | --- | --- | --- | | 92.5 | 3.6 | 96.4 | 7.5 | 94.3 | |
| Mashiyama et al., 201523  Panasonic's Grid-EYE® AMG8831   8x8 pixels | Empty room 1 Sensor: 1 mounted on the ceiling at 2.57 m from the floor. Ground capture perimeter: 3.5 m x 3.5 m Ambient temperature: 23 °C Participants: 6  Empty room 2 Sensor: 1 mounted on the ceiling at 2.75 m from the floor. Ground capture perimeter: 3.5 m x 3.5 m Ambient temperature: 26 °C Participants: 2 of 6 of the empty room 1  Total recorded data:  Training data: falling 50 times, sitting down 30 times, and walking 45 times (4 participants including one from the room 2).  Testing data: falling 30 times, sitting down 20 times, and walking 27 times (1 participant per room). | Frame rate: between 1 and 10 fps.  They decided whether there was a moving person or not by calculating temperature variance of each pixel over F frames. When one or more temperature variance> Vth, then there was a moving person in the detection area who was moving 4 features were extracted, otherwise “no event” or “stopping”. Then, when the temperature difference between a person and the background> *Tth*, then there was a stopping person, otherwise “no event”. Thresholds: *Tth* = 1.8 °C, *Vth* = 1 °C², F = 20 frames.  4 features:  *(F*act*)* Active frame (The number of consecutive frames where motion is detected).  *(P*num*)* Maximum number of reacting pixels (>thresholds).  *(V*max*)* Maximum temperature variance (in the image interval).  *(D*mov*)* Moving distance (Euclidean distance of pixel displacement at T °C max).  Machine learning classifier: classification into 6 actions using a SVM where they used LibSVM. | Accuracy (Ac): The number of correctly classified frames divided by the number of total frames (in %)  Performance for the system using all the features   |  | Ac |  | | --- | --- | --- | | No event | 100 |  | | Standing up | 94.8 |  | | Falling | 100 | (30/30) | | Sitting down | 78.6 | (17/20) | | Walking | 99.9 | (26/27) | |
| Ogawa & Naito, 202036  Melexis MLX90621   4x16 pixels | Empty room Sensors: 2 mounted on the ceiling, side by side, at 2.8 m from the floor. Ground capture perimeter: 2 m x 7 m Ambient temperature: unspecified Participants: 10  Per participant: Nobody in the room 50 times.  Falling from a standing position 50 times.  Walking for 2s 50 times.  Lying down in 2s 50 times.  Total recorded data: 2000 actions using a k-fold cross-validation.  Learning data of each action was acquired at place randomly to detect fall anywhere within the detection range. | Frame rate: 10 fps.  The two sensors were synchronized to extend the ground capture perimeter and to obtain one temperature distribution. Acquired data of the two sensors, including one temperature distribution data, the device number and acquiring time were recorded, combined, and synchronized to create one temperature distribution. Each action was acquired by 20 temperature distributions for 2 s.  They did not address feature extraction, but they specified that they could observed three important parameters with an image of multiple temperature distributions and behaviors in 2 seconds: The area covered by higher temperatures.  The speed the movement. The acceleration of the movement.  Machine learning classifiers: LDN *vs.* k-NN (k unspecified) *vs.* SVM *vs.* NaiveB *vs.* AdaBoost *vs.* RandFor (number of three unspecified) *vs.* Bagging *vs.* Voting (based on the other 3 most accurate algorithms). | Accuracy (Ac): equation unspecified.  The performance was estimated by 5-fold cross-validation.   |  | Acg | | --- | --- | | LDA | 92 | | k-NN | 93 | | SVM | 39.75 | | NaiveB | 66.25 | | AdaBoost | 68 | | RandFor | 64.75 | | Bagging (with the k-neighbor classifier better than the highly accurate linear discrimination) | 95.75 | | Voting (using highly accurate LDA, k-NN, and bagging algorithms) | 97.75 | |
| Shelke & Aksanli, 201937  Melexis MLX90621   4x16 pixels | Empty room Sensors: 2 mounted on the wall (height unspecified), aligned, one above the other, to cover an area of 16 pixels on the ordinate and 8 pixels on the abscissa. Ground capture perimeter: unspecified Ambient temperature: unspecified Participants: 10  4 classes of postures were performed several times  20 812 standing positions 20 867 sitting positions on a chair 21 182 sitting positions on the floor 20 000 lying positions Total recorded data: 82 861 postures during 7 days, 70% was used as training data.  N.B.: They performed a dynamic acquisition consisting of recording the walk forward, backward, left, and right movement, relative to the point of view of the sensors (not relevant to the topic of this review). | Frame rate: unspecified.  The two sensors were synchronized to extend the ground capture perimeter and to obtain one temperature distribution. Background subtraction: They captured 10,000 background frames and simple subtracted the average of these frames from each normal pixel-wise. Then, they applied a Gaussian filter to each frame before feeding it to the learning algorithm.  After background subtraction, negative values were set to zero. At each frame, the dark pixels were zeros and brightness increases with an elevation in pixel intensity to red and then to yellow (up to 255).  Machine learning classifiers: classification into 4 postures using: Logistic (using used the one-vs.-rest scheme, a linear solver with L2 regularization strength parameter C = 1 in Scikit-Learn) *vs.* SVM (with a third degree RBF kernel, "hinge" loss, one-vs.-one scheme and regularization parameter C = 1) *vs.* DecTree (with Scikit-Learn that uses a classification and regression tree training algorithm with Gini impurity index) *vs.* RandFor (with 10 decision trees) *vs.* NaiveB (Gaussian Naive Bayes) *vs.*  fNN, hidden architecture: input layer with 128 nodes (2 x 4 x 16), 2 hidden layers with 10 nodes (no precision for output layer). They added 3 parameters: (1) leaky Relu (rectified linear unit) as the activation function, (2) mini-batch gradient descent for learning the weights with batch size 100, and (3) 0.001 as the learning rate of the mini-batch gradient descent algorithm. | Accuracy   | Stand | Sit (chair) | Sit (floor) | Lie | | --- | --- | --- | --- | | Logistic | | | | | 99.94 | 99.97 | 99.94 | 99.95 | | SVM | | | | | 99.91 | 99.93 | 99.89 | 99.90 | | DecTree | | | | | 99.80 | 99.71 | 99.42 | 99.63 | | RandFor | | | | | 99.97 | 99.94 | 99.92 | 99.96 | | NaiveB | | | | | 65.52 | 74.75 | 70.17 | 76.03 | | fNN | | | | | 99.98 | 99.96 | 99.99 | 99.97 |   *F1*   | Stand | Sit (chair) | Sit (floor) | Lie | | --- | --- | --- | --- | | Logistic | | | | | 99.98 | 99.95 | 99.89 | 99.89 | | SVM | | | | | 99.82 | 99.87 | 99.78 | 99.80 | | DecTree | | | | | 99.60 | 99.43 | 99.87 | 99.23 | | RandFor | | | | | 99.96 | 99.89 | 99.85 | 99.92 | | NaiveB | | | | | 53.36 | 0.09 | 54.74 | 0.83 | | fNN | | | | | 99.97 | 99.93 | 99.98 | 99.95 | |
| Sixsmith & Johnson, 200421  Irisys   16x16 pixels | Living room (3.3 m x 4m)  Furniture: chair, settee, tables, dresser, cupboard, stereo system, and TV Sensor: 1 mounted on a corner between two walls at 2.1 m from the floor. Ground capture perimeter: unspecified Ambient temperature: unspecified Participants: 1  Step 1: training data 108 predefined scenarios of falls, covering a variety of fall types, viewpoints, and degrees of obscuration.  The 108 scenarios produced approximately 10,000 sample vectors for network training, each vector classified as either a fall or non-fall.  Step 2: testing data 20 predefined scenarios of variable falls (direct falls, slips) and dynamic movements (torsion movements of the trunk and arms) in different orientations and in different light atmospheres.  10 predefined scenarios of variable non-falls (including jumps and suddenly sitting down). | Frame rate: unspecified.  Machine learning classifier: classification into "fall" and "non-fall" using an MLP. | Confusion matrix  Fall   | TP | FP | TN | FN | | --- | --- | --- | --- | | 35.7 | 3.3 | 64.3 | 96.7 |   Non-fall   | TP | FP | TN | FN | | --- | --- | --- | --- | | 100 | 0 | - | - | |

| Taniguchi et al., 201438  Omron Corporation, D6T-1616-L-06  16x16 pixels | Bedroom with only a single bed, the long side against the wall and the short side facing the center of the room. Sensors: 2 sensors. 1 mounted on the ceiling at 2.5 m from the floor, and 1 mounted on the wall 1 m from the floor (vision of the bed in its width). Ground capture perimeter: unspecified Ambient temperature: unspecified Participants: 2 (height = 168–172 cm)  Per participant:  3 predefined scenarios each performed twice, and following the orders: 0-1-2-3-4-7, 0-1-2-3-4-6, and 0-1-2-3-4-5-1-7.  With:  0 = Nobody in the measurement area. 1 = Walking. 2 = Lying down on the bed. 3 = Sitting down on the bed. 4 = Sitting down on the edge of the bed. 5 = Standing up beside the bed. 6 = Falling from the bed. 7 = Falling.  They analyzed each type of transition. | Frame rate: unspecified.  Definition of areas of interest:  3 regions for the ceiling sensor: whole area, bed area and side of bed area facing the center of the room.  6 regions for the wall sensor: whole area, bed area, area above the bed, high, low and at bed height regions but outside the bed area (in front of the side facing the center of the room).  When the temperature values exceeded a threshold in a region, according to a posture and according to a number F of frames (F= 20), then extraction of the features. Thresholds: there were as many thresholds as action but all were unspecified.  9 features:  *DTCt(x,y)* Mean differences of *TCt*(*x*,*y*) among 20 samples (one for each region of the ceiling sensor) *DTWt(x,y)* Mean differences of *TWt*(*x*,*y*) among 20 samples (one for each region of the of the sensor on the wall)  Depending on the variations or not in temperatures on the different regions and sensors (= combinations), an activity was determined.  They used the "Posture (t) = X IF, OR, OTHERWISE" logic to determine an activity based on the transition from an old posture to the current posture:  "Posture (t) = 2 IF ..., OR = 7 IF ..., OTHERWISE = 1"  "Posture (t) = 5 IF ..., OR = 6 IF ..., OR = 7 IF ..., OTHERWISE = 4"  "Posture (t) = 1 IF ..., OTHERWISE = 0"  "Posture (t) = 3 IF ..., OTHERWISE = 2"  "Posture (t) = 4 IF ..., OTHERWISE = 3"  "Posture (t) = 1 IF ..., OTHERWISE = 5" | Participant 1:   |  | Ac | ESp | ESe | | --- | --- | --- | --- | | From 0–1 | 95.5 | 10.7 | 0.8 | | From 1–2 | 96.2 | 4 | 2.8 | | From 2–3 | 89.7 | 24.2 | 1.1 | | From 3–4 | 73.7 | 23.2 | 0 | | From 4–5 | 87.3 | 43.9 | 1.7 | | From 4–6 | 97.7 | 5.6 | 0 | | From 4–7 | 95.5 | 0 | 8.3 | | From 5–1 | 72.7 | 16.7 | 36.1 | | From 1–7 | 81.8 | 18.2 | 0 | | Mean | 89.2  (± 7.7) | 16.2  (± 12.6) | 5.7  (± 11) |   Participant 2:   |  | Ac | ESp | ESe | | --- | --- | --- | --- | | From 0–1 | 87.2 | 27.9 | 0 | | From 1–2 | 94.3 | 8.7 | 0 | | From 2–3 | 86 | 37.2 | 0 | | From 3–4 | 90.7 | 1.7 | 23.7 | | From 4–5 | 94.4 | 0 | 6.7 | | From 4–6 | 93.8 | 35.4 | 0 | | From 4–7 | 97.8 | 14..3 | 0 | | From 5–1 | 82.8 | 0 | 35.5 | | From 1–7 | 79 | 40 | 0 | | Mean | 89.2  (± 6.5) | 17.8  (± 12.4) | 7.3  (± 12.4) | |
| --- | --- | --- | --- | --- | --- | --- | --- | --- | --- | --- | --- | --- | --- | --- | --- | --- | --- | --- | --- | --- | --- | --- | --- | --- | --- | --- | --- | --- | --- | --- | --- | --- | --- | --- | --- | --- | --- | --- | --- | --- | --- | --- | --- | --- | --- | --- | --- | --- | --- | --- | --- | --- | --- | --- | --- | --- | --- | --- | --- | --- | --- | --- | --- | --- | --- | --- | --- | --- | --- | --- | --- | --- | --- | --- | --- | --- | --- | --- | --- | --- | --- | --- | --- | --- | --- | --- | --- | --- | --- | --- | --- |
| Tao et al., 201840  Tao et al., 201939  Panasonic's Grid-EYE® AMG88??  8x8 pixels | Empty room 1 Sensor: 1 mounted on the ceiling (height unspecified). Ground capture perimeter: unspecified Ambient temperature: unspecified Participants: 8  They used their "Infra-ADL2018” dataset.  Per participant:  8 actions 3 times each. Falling  Staying seated  Staying up  Standing up from a chair  Sitting down on a chair (from a standing position)  Walking from the left side to the right side of the room  Walking from the right side to the left side of the room  Total recorded data: 192 actions using a leave-one-participant-out cross validation.  N.B.: The study of Tao et al., 201840 included another experiment with 3 sensors placed on three different walls, but they did not analyze the fall. | Frame rate: unspecified.  Background subtraction: The background was recorded, without participant, from a given number F of Frames. Then, it was formed by the average of the temperatures, for each pixel, of the given F frames. Then, the current frame was subtracted from the background.  Detection method 140: F depended on the type of action. *(1D DTC)* (Discrete Cosine Transform) Temporal feature using the first 5 lowest frequency components of the frequency coefficients. *(2D DTC)* Spatial feature using a set of 3 x 3 coefficients located in the upper left corner of the coefficient matrix of 8 x 8. Machine learning classifier: classification into 7 actions using a multi-class linear Support Vector Machine using the concatenation of the temporal and spatial features.  Detection method 239: F = 20.  The current image was compared to the average of the previous 19. Machine learning classifier: classification into 7 actions using an 3D-ConvNet Hidden architecture: Panasonic input layer 8k x 8k x 20 frames (32 feature maps), Convolutional input Layer 3D with kernel of size 3 x 3 x 3 (32 feature maps), Maxpooling hidden Layer 3D with kernel of size 2 x 2 x 2, Convolutional input Layer 3D with kernel of size 3 x 3 x 3 (16 feature maps), Maxpooling hidden Layer 3D with kernel of size 2 x 2 x 2, Fully Connected SoftMax hidden layer with 128 neurons, Fully Connected SoftMax hidden layer with 7 neurons (7 actions), and output layer (1 neuron).  All of the convolution layers are applied with padding on both spatial and temporal dimensions with stride length of 1. | Accuracy (Ac): unspecified.  Detection method 140:   |  | Ac | | --- | --- | | Falling | 100 | | Staying seated | 71.43 | | Staying up | 61.11 | | Standing up from a chair | 90.48 | | Sitting down on a chair | 90.47 | | Walking (from left–right sides) | 95.24 | | Walking (from right–left sides) | 100 | | Global | 87.50 |   Detection method 239:   | Falling | 100 | | --- | --- | | Staying seated | 100 | | Staying up | 100 | | Standing up from a chair | 90.48 | | Sitting down on a chair | 95.24 | | Walking (from left–right sides) | 100 | | Walking (from right–left sides) | 95.24 | | Global | 97.22 | |
| Taramasco et al., 201841   Taramasco et al., 202042  Omron Corporation, D6T-8L-06  1x8 pixels | Living room (4 m x 5m)  Furniture: chairs, settee, tables, armchair, cupboard, and TV. Sensors: 4 Sensors. Sensor pole placed in a corner of the living room, composed of 2 sensors placed side by side covering 16 pixels on the abscissa and 1 pixel on the ordinate, at 2 different heights from the floor (0.1 m and 1 m). Capture perimeter: height of a human and 4 m in depth.  Ambient temperature: between 16 and 20 °C  Participants: 4 (age = 27–37 years, height = 147–182 cm)  Step 1: pre-tests for 24 hours with 1 participant under different conditions, at different distances from the room, and by 30 s activity sequence.  Step 2: tests with 4 participants, in the form of scenarios, each of 30s and alternating actions of fall and daily-life movements.  Scenarios of evaluation of falls  Backward falls (ending lying, ending in lateral position, and ending sitting, 8 times each).  Forward falls (with forward arm protection and then ending lying flat, with rotation ending in lateral right position, with rotation ending in lateral left position, and ending on the knees, 8 times each).  Lateral falls to right or left (ending lying flat and ending lying while sitting, 8 times each per side).  Scenarios of evaluation of daily-life movements: Walking slowly and quickly 16 times.  Stumble while walking 8 times.  Jogging slowly and quickly 16 times.  Sitting down quickly or slowly in a chair, waiting and then standing up quickly, 16 times.  Staying seated, trying to get up and then collapsing into a chair 8 times.  Crouching down with or without bending the knees, waiting and then getting up, 8 times.  Jumping gently without falling 8 times.  Rotating 180° in front of sensor 8 times.  Total recorded data: 384 falls and 448 daily-life movements, 80% was used as training data. | Frame rate: 1 fps  Evolution of the spatial distribution of the temperatures of the 4 synchronized sensors per period of 30 s (30 frames).  Machine learning classifier: classification using a combination of an CNN and an RNN.  Type 1: Convolutional input Layer 1D with kernel of size 3 (32 nodes), Maxpooling hidden Layer 1D with a 2-pool size (32 nodes), LSTM hidden layer (100 nodes), LSTM hidden layer (50 nodes), and output layer (1 node) *vs*.  Type 2: Convolutional input Layer 1D with kernel of size 3 (32 nodes), Maxpooling hidden Layer 1D with a 2-pool size (32 nodes), GRU hidden layer (100 nodes), GRU hidden layer (50 nodes), and output layer (1 node) *vs.*  Type 3: Convolutional input Layer 1D with kernel of size 3 (32 nodes), Maxpooling hidden Layer 1D with a 2-pool size (32 nodes), BiLSTM hidden layer (50 nodes), and output layer (1 node). | Type 1, CNN + LSTM   | Ac | Se | Sp | | --- | --- | --- | | 91  (86.1–94.4) | 89  (80.4–94.1) | 93  (86.4–96.9) |   Type 2, CNN + GRU   | Ac | Se | Sp | | --- | --- | --- | | 87.5  (82.2–91.7) | 85  (76.7–91.8) | 89  (82–94.3) |   Type 3, CNN + BiLSTM   | Ac | Se | Sp | | --- | --- | --- | | 93  (88.4–95.9) | 93  (88.5–97) | 93  (86.4–96.9) | |
| Abbreviations: °C: degree Celsius; %: per cent; 1D: one dimension; 3D: three dimensions; Ac: accuracy; Acf: fall action accuracy; Acg: global accuracy; Acnf: “non-fall” actions accuracies; AdaBoost: adaptive boosting; Bagging: bootstrap aggregating; BiLSTM: bidirectional long short-term memory; CNN: convolutional neural network; DecTree: decision tree; ESe: error of sensibility; ESp: error of specificity; F: frame; FP: false positive; FN: false negative; fNN: feed-forward neural network; fps: frame per second; GRU: gated recurrent unit; GRU-ATT: gated recurrent unit with attention link; LDA: linear discriminant analysis; LibSVM: library for support vector machines; Logistic: logistic regression; LSTM: long short-term memory; LSTM-ATT: long short-term memory with attention link; lux: luminous flux per unit area; k: kernel; k-NN: k-nearest neighbors; m: meter; m/s: meter per second; MLP: multilayer perceptron; NaiveB: naive bayes; Pr: precision; s: second; Se: sensibility; Sp: specificity; RandFor: random forest; RBF kernel: radial basis function kernel; Relu: rectified linear unit; RMS: root mean square; RNN: recurrent neural network; SVM: support vector machine; T: temperature; Tth: temperature threshold; TN: true negative; TP: true positive; vs.: versus; Vth: Variance threshold. | | | |

| **Table S2:** Methodological limitations in the included studies | | | | |
| --- | --- | --- | --- | --- |
| **Authors** | **System Architecture Description** | **Experimental Procedure** | **Detection Method Description** | **Performance Measures** |
| Adolf et al., 201827 | - Little description of the system components - No estimate of power consumption | - Few participants (<10) No description of the participants - No furniture in the room - Temperature range tested too narrow | - Poor description concerning the use of the CNN Inception V3 | - No accuracy and precision estimates - No performance estimate expressed as a function of ambient temperature |
| Chen & Ma, 201528 | - No estimate of power consumption | - Few participants (<10) - No description of the participants - No furniture in the room - Ambient temperature unspecified | _ | - Equations unspecified - No performance estimate by action - No performance estimate expressed as a function of the distance between the participants and the sensors placed on the wall - No performance estimate expressed as a function of ambient temperature |
| Chen & Wang, 201829 | - No estimate of power consumption | - Few participants (<10) - No description of the participants - No furniture in the room - Only one ambient temperature for tests | - Frame-rate unspecified | - Equations unspecified - No precision, sensibility and specificity estimates - Performance displayed on graph without exact values - No performance estimate expressed as a function of the distance between the participants and the sensors placed on the wall - No performance estimate expressed as a function of ambient temperature |
| Fan et al., 201730  Fan et al., 201831 | - Sensor position on the ceiling unspecified - No estimate of power consumption | - Only one participant for tests - No description of the participant - No furniture in the room - Only one type of action (fall forward) | _ | - No accuracy and specificity estimates - No performance estimate expressed as a function of ambient temperature |
| Gochoo et al., 201832 | - No estimate of power consumption | - Few participants (<10) - No furniture in the room - Only one distance between the participants and the sensors placed on the wall tested (1.5m) - Temperature range tested too narrow | _ | - No performance estimate expressed as a function of the distance between the participants and the sensors placed on the wall - No performance estimate expressed as a function of ambient temperature |
| Hayashida et al., 201733,34 | _ | - Few participants (<10) - No description of the participants - No furniture in the room - Type of falls unspecified | _ | - No precision, sensibility and specificity estimates - No performance estimate by action |
| Liu et al., 202035 | - Sensor only linked to a computer (no more information) - Power consumption depends on that of the computer | - Few participants (<10) - No furniture in the room - Type and number of actions per participant unspecified - Type of falls unspecified - Ambient temperature unspecified | - Frame-rate unspecified | - No specificity estimates - No performance estimate expressed as a function of ambient temperature |
| Mashiyama et al., 201422 | - No estimate of power consumption | - Few participants (<10) - No description of the participants - No furniture in the room - Few types of actions - Type of falls unspecified | _ | - No precision, sensibility and specificity estimates - No performance estimate by action - No performance estimate expressed as a function of ambient temperature |
| Mashiyama et al., 201523 | - No estimate of power consumption | - Few participants (<10) - No description of the participants - No furniture in the room - Type of falls unspecified - Temperature range tested too narrow | _ | - No precision, sensibility and specificity estimates - No performance estimate expressed as a function of ambient temperature |
| Ogawa & Naito, 202036 | - No estimate of power consumption | - No description of the participants - No furniture in the room - Type of falls unspecified - Ambient temperature unspecified | - Poor description concerning the extracted features - Poor description concerning the machine learning classifiers used (e. g., k unspecified for k-NN) | - Equations unspecified - No precision, sensibility and specificity estimates - No performance estimate by action - No performance estimate expressed as a function of ambient temperature |
| Shelke & Aksanli, 201937 | - Sensors positions on the wall unspecified - No estimate of power consumption | - Distance between the participants and the sensors on the wall unspecified - No description of the participants - No furniture in the room - Ambient temperature unspecified | - Frame-rate unspecified - No description indicating if the features are extracted | - No precision, sensibility and specificity estimates - No performance estimate expressed as a function of the distance between the participants and the sensors placed on the wall - No performance estimate expressed as a function of ambient temperature |
| Sixsmith & Johnson, 200421 | - Little description of the system components - No estimate of power consumption | - Only one participant - No description of the participant - Ambient temperature unspecified | - Frame-rate unspecified - Poor description concerning the use of the MLP | - Confusion matrix only and regarding fall vs. non-fall actions - No performance estimate expressed as a function of ambient temperature |
| Taniguchi et al., 201438 | - Sensor only linked to a computer (no more information) - Power consumption depends on that of the computer | - Only two participants - Ambient temperature unspecified - Poor number of trials per action | - Frame-rate unspecified | - No precision, sensibility and specificity estimates - No performance estimate expressed as a function of ambient temperature |
| Tao et al., 201840  Tao et al., 201939 | - Little description of the system components - Sensor only linked to a computer (no more information) - Sensor position on the ceiling unspecified - No estimate of power consumption | - Few participants (<10) - No description of the participants - No furniture in the room - Type of falls unspecified - Ambient temperature unspecified | - Frame-rate unspecified | - No precision, sensibility and specificity estimates - No performance estimate expressed as a function of ambient temperature |
| Taramasco et al., 201841  Taramasco et al., 202042 | - No estimate of power consumption | - Few participants (<10) - Temperature range tested too narrow | _ | - No precision estimates - No performance estimate expressed as a function of the distance between the participants and the sensors placed on the sensor pole - No performance estimate by action - No performance estimate expressed as a function of ambient temperature |
